# Supplementary material
Source: Springer Nature journal article supplement (https://www.springermedizin.de/resource/supplementary/13002_2013_366_MOESM2_ESM.pdf/9627726)

Nekemete (2140 m)  
[10]

18.8 °C

2067 mm

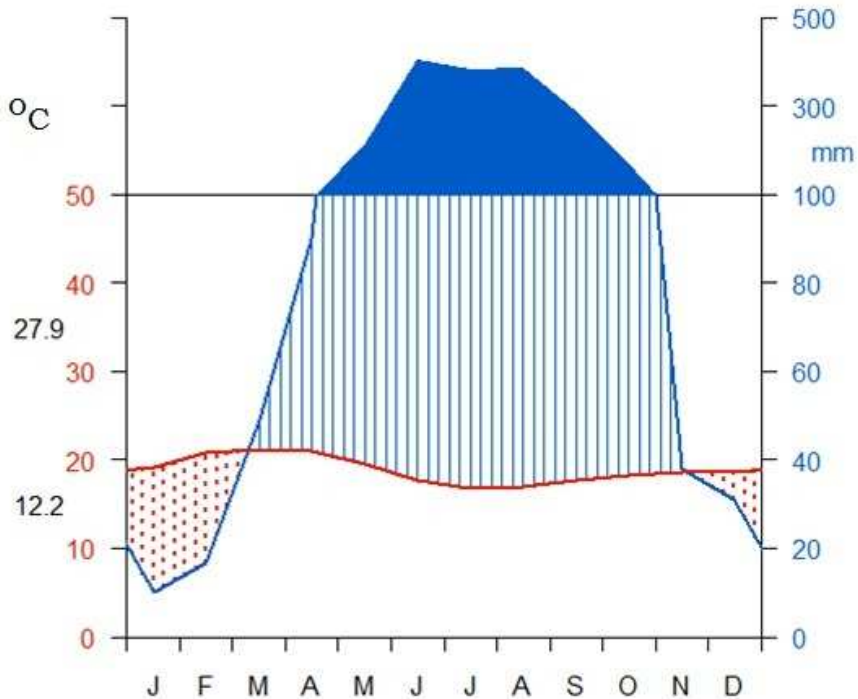

Supplement: MOESM2 [file 9627726]
